# Supplementary material
Source: Springer Nature journal article supplement (https://www.springermedizin.de/resource/supplementary/13075_2012_4437_MOESM12_ESM.pdf/10110406)
Supplement: MOESM12 [file 10110406]

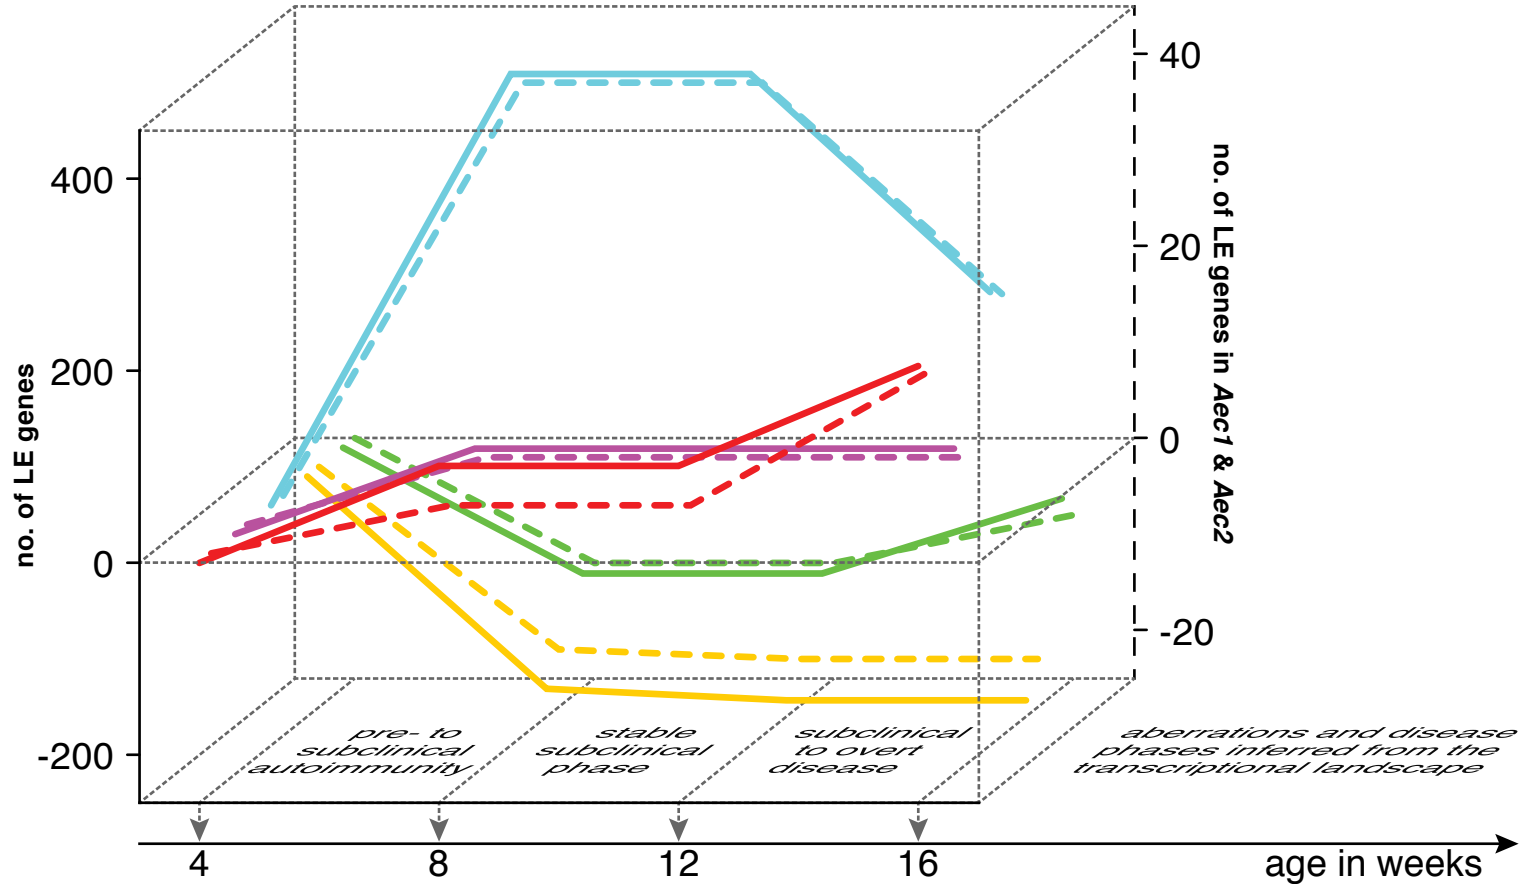

aberrant salivary gland physiology

autoantibodies

focal inflammation

hyposalivation

Immunity

Focal adhesion & motility,  
cell-cell junctions &  
cytoskeleton organization

ECM turnover

Insr / Igfr1 signaling

Neurotransmission
